## Local Cerebral Glucose Utilization in Stimulated Rats Sedated with Thiopental

David P. Archer, M.D., F.R.C.P.C.,\* Jennifer Froelich, M.D.,† Michael McHugh, M.Sc.,‡ Hanna M. Pappius, Ph.D.§

**Background:** Recent studies have suggested that supraspinal structures are involved in barbiturate-induced enhancement of nociceptive processing. The goal of the study was to determine whether cortical and subcortical regions involved in nociception were relatively activated or depressed by noxious stimulation during infusion of small doses of thiopental.

**Methods:** Local cerebral glucose utilization (LCGU) was measured with the  $^{14}\text{C}$ -2-deoxyglucose radioautographic technique in 14 rats. During the LCGU experiment, pressure was applied to the tail every 2 min, and the somatic motor response threshold was recorded. Seven animals received thiopental infusions to produce a steady-state plasma concentration (target concentrations of 10  $\mu\text{g}/\text{ml}$ ), and seven untreated animals served as controls.

**Results:** A steady-state plasma thiopental concentration ( $11.1 \pm 1.8$  to  $13.0 \pm 2.1$   $\mu\text{g}/\text{ml}$ ) was accompanied by a decrease in the somatic motor response threshold from  $277 \pm 32$  g (before thiopental) to  $215 \pm 41$  g ( $P < 0.001$ ). The somatic motor response threshold remained unchanged in the control group. Average LCGU was 29% less in the thiopental-treated animals than in the untreated controls ( $P < 0.001$ ). In cortical regions associated with nociception, LCGU was relatively increased ( $+3\% \pm 14\%$ ) during the thiopental infusion in comparison to the visual and auditory cortices ( $-18\% \pm 13\%$ ;  $P < 0.001$ ). Individual structures that showed relative changes during thiopental infusion included the nucleus accumbens ( $+17\%$ ,  $P < 0.05$ ) and the habenula ( $-17\%$ ,  $P < 0.05$ ). Heterogeneous relative changes ( $P < 0.05$ ) in LCGU were observed in the auditory system: auditory cortex ( $-22\%$ ), medial geniculate ( $-16\%$ ), lateral lemniscus ( $+26\%$ ), superior olive ( $+38\%$ ).

\* Associate Professor, Department of Anaesthesia, University of Calgary.

† Resident in Anaesthesia, Department of Anaesthesia, University of Calgary.

‡ Research Assistant, Department of Neurochemistry, Montreal Neurological Institute, McGill University.

§ Professor, Department of Neurology and Neurosurgery, Montreal Neurological Institute, McGill University.

Received from the Department of Anaesthesia, University of Calgary, Calgary, Canada, and the Department of Neurology and Neurosurgery, Montreal Neurological Institute, McGill University, Montreal, Canada. Submitted for publication November 22, 1994. Accepted for publication March 28, 1995.

Address correspondence to Dr. Archer: Department of Anaesthesia, Foothills Hospital, 1403 29th Street NW, Calgary, Alberta, Canada, T2N 2T9.

**Conclusions:** Noxious stimulation during low-dose thiopental infusions relatively increased LCGU in cortical regions postulated to be responsible for processing of noxious stimuli. Nuclei in the descending pain modulating system were not relatively depressed. (Key words: Anesthetics, intravenous; thiopental. Brain, metabolism.)

BASED on evidence from both behavioral studies<sup>1-5</sup> and from single-unit dorsal horn recordings,<sup>6-8</sup> barbiturates enhance nociceptive transmission when the spinal cord is intact.<sup>9</sup> The mechanism of this effect remains controversial.<sup>10</sup> Because barbiturates depress sensitivity to noxious stimulation in spinal cord-injured animals and in *in vitro* preparations,<sup>7,11,12</sup> supraspinal mechanisms may be important in the antianalgesic or hyperalgesic effects of these drugs.<sup>10</sup> To further evaluate the influence of barbiturates on nociceptive transmission, two recent studies<sup>1,13</sup> have characterized the relationships between plasma concentrations of barbiturates and the somatic motor response threshold (SMRT) to tail pressure. At plasma concentrations of thiopental associated with mild-to-moderate sedation, the a steady-state reduction of the motor response threshold correlated with reductions in tail-flick latency.<sup>1</sup> We speculated that noxious stimulation during an infusion of thiopental that reduces the SMRT would cause a relative increase in functional activity in brain regions involved in sensory and affective processing of noxious stimuli,<sup>9</sup> and mesencephalic structures involved in the descending pain modulating system might be preferentially depressed.<sup>10</sup> The current study was undertaken to test the hypothesis that, in comparison to a control state (saline infusion), noxious stimulation during a low-dose infusion of thiopental would produce relative changes in local cerebral glucose utilization (LCGU) in supraspinal brain regions purported to be involved in nociceptive transmission.

### Materials and Methods

After approval by the Animal Care Committees of the Montreal Neurological Institute and the University of

Calgary, 14 male Sprague Dawley rats were used in these experiments. We prospectively studied the effects of repeated noxious stimulation during repeated noxious stimulation while receiving sedation with steady-state plasma concentrations of thiopental and compared these measurements with control animals not receiving thiopental.

### Preparation for Autoradiography

We conducted these experiments in a double-blind fashion. The rats were prepared for partial restraint by a plastic collar around the neck. The animal was anesthetized with thiopental (100 mg/kg) by femoral arterial and venous catheterization. The animal was then placed under direct vision. After application of a topical 2% lidocaine jelly to the wound, the animal was partially restrained in a plastic collar. The animal's ankles were secured to the lower thorax and abdomen. Two hours were allowed for the animal to recover from the halothane, during which time the animal was monitored with a rectal probe. The animal was then maintained at  $36-38^\circ\text{C}$  with a heating blanket. In this study, we evaluated the general effects of thiopental on nociceptive transmission by visual inspection and with blood gas tensions and mean arterial pressure. These measurements of these variables were made at normal limits for our laboratory: arterial carbon dioxide tension  $> 75$  mmHg, arterial carbon dioxide pressure  $> 45$  mmHg, pH 7.30-7.45, and arterial oxygen pressure  $> 85-120$  mmHg.

Thiopental was administered by a computer-controlled infusion pump to produce a steady-state plasma concentration of 10  $\mu\text{g}/\text{ml}$ . This concentration has been shown to be associated with a sedative effect by approximately 30%. The target concentration was achieved by a bolus and infusion. The infusion rate for each rat according to weight was determined by a program (STANPUMP) on a 286 computer driving a Harvard Apparatus, South Natick, MA. The program used pharmacokinetic model predictions of plasma thiopental concentration.

### Measurement of Somatic Motor Response Threshold

A modification of the paw-pressure method was used to measure the SMRT to tail pressure. The animal was restrained while analgesia increases the SMRT. The animal was then placed in a Harvard Apparatus (Ugo Basile, Milan, Italy) apparatus. The animal's pressure to randomly selected

## EFFECTS OF STIMULATION ON LCGU DURING SEDATION

Calgary, 14 male Sprague Dawley rats were studied. In these experiments, we prospectively measured LCGU during repeated noxious stimulation in animals receiving sedation with steady-state infusions of thiopental and compared these measurements with concurrent control animals not receiving thiopental.

#### Preparation for Autoradiographic Studies

We conducted these experiments under the conditions of partial restraint commonly used for autoradiographic studies in the rat.<sup>14</sup> Briefly, after weighing, each animal was anesthetized with 2% halothane in oxygen. Femoral arterial and venous catheters were inserted under direct vision. After application of a thin film of 2% lidocaine jelly to the wound edges, the animal was partially restrained in a plaster cast extending from the ankles to the lower thorax and taped to a lead block. Two hours were allowed for the animals to eliminate the halothane, during which time body temperatures were monitored with a rectal thermometer and maintained at 36–38°C with a heating lamp. Before each study, we evaluated the general health of each animal by visual inspection and with measurements of arterial blood gas tensions and mean arterial pressure to ensure that measurements of these variables were within the normal limits for our laboratory (arterial oxygen tension > 75 mmHg, arterial carbon dioxide tension 30–45 mmHg, pH 7.30–7.45, and mean arterial pressure 85–120 mmHg).

Thiopental was administered with a computer-controlled infusion pump to provide clamping at a plasma target concentration of 10 µg/ml,<sup>15</sup> which has been shown to be associated with a reduction of the SMRT by approximately 30%.<sup>1</sup> The target concentrations were achieved by a bolus and infusion strategy individualized for each rat according to weight. The pharmacokinetic program (STANPUMP) was run with a standard Intel 286 computer driving a Harvard Apparatus Pump 22 (Harvard Apparatus, South Natick, MA). The program used pharmacokinetic modeling to provide real-time predictions of plasma thiopental concentrations.

#### Measurement of Somatic Motor Response Threshold

A modification of the paw-pressure test<sup>16,17</sup> was used to measure the SMRT to tail pressure. Enhanced nociceptive transmission results in a decrease in the SMRT, while analgesia increases the SMRT. An Analgesy-Meter (Ugo Basile, Milan, Italy) applied a linearly increasing pressure to randomly selected points within the distal

2 cm of the tail, which was supported on a plinth. The end-point (SMRT) was defined as the first movement of the tail that could displace it from the plinth.

The behavioral status of each animal was recorded at the outset of the experiment and just before blood sampling for plasma thiopental concentrations. The behavior status was classified as awake (actively exploring the environment), drowsy (not actively exploring, but easily stimulated by manipulating the head or vibrissae), very drowsy (responds only to vigorous head manipulation), and unresponsive.

The timing of the SMRT measurements and the deoxyglucose injection were based on the program predictions of plasma thiopental levels. Control measurements of the SMRT were made at the beginning of the experiment (initial measurement). The bolus and infusion strategy was begun. Predicted steady-state plasma thiopental concentrations were achieved approximately 5 min later. The SMRT measurements were made when steady-state conditions for plasma thiopental concentrations were predicted by the computer and 3 and 6 min later (three “before 2-deoxyglucose (2-DG) measurements” in each animal). Deoxyglucose was injected 8 min after steady-state thiopental concentrations were predicted. The SMRT measurements were repeated every 2 min during the first 14 min of the 2-DG experiment (seven “during 2-DG measurements” in each animal). Blood samples for plasma thiopental concentration were drawn 2 min (“before 2-DG” value) and 10 min (“during 2-DG” value) after the computer predicted a steady-state plasma thiopental concentration.

Thiopental concentrations in plasma were measured by high performance liquid chromatography with spectrophotometric detection as previously described.<sup>1,18</sup> The total volume of blood samples withdrawn from each animal was approximately 2 ml (15 × 100 µl (2-DG study) and 2 × 250 µl for thiopental measurements). Blood samples were replaced with a volume of normal saline equal to three times the blood sample volume.

#### Measurement of Local Cerebral Glucose Utilization

LCGU was measured with the autoradiographic 2-DG method of Sokoloff *et al.*<sup>19</sup> The experiment began with the injection of 30 µCi of [<sup>14</sup>C]DG over 30 s (2-deoxy-d-[1-<sup>14</sup>C]-glucose-specific activity of 35–40 mCi/mmol, New England Nuclear, Boston, MA). 2-DG was injected 8 min after the STANPUMP program had predicted a



steady-state plasma thiopental concentration. Control animals were treated identically to thiopental-treated animals; the syringe contained saline. Timed arterial sampling for plasma concentrations of [ $^{14}\text{C}$ ]DG and glucose began 15 s after the start of the injection and continued for 45 min. Plasma glucose concentration was measured with a Beckman Glucose Analyzer2 (Beckman Instruments, Brea, CA). Plasma [ $^{14}\text{C}$ ]DG content was measured with a liquid scintillation counter (model 1219, LKB Rackbeta Liquid Scintillation Counter, Allied Scientific, Montreal, Canada) with calibrated [ $^{14}\text{C}$ ] toluene internal standards (New England Nuclear). Animals were killed by decapitation and the brains rapidly removed and frozen in isopentane cooled to  $-50^{\circ}\text{C}$  to  $-60^{\circ}\text{C}$  by liquid nitrogen vapor. Brains were cut into 20- $\mu\text{m}$ -thick sections in a cryostat (American Optical, Buffalo, NY). Autoradiographs were prepared from the dried brain sections, using calibrated [ $^{14}\text{C}$ ] methylmethacrylate (New England Nuclear) as internal standards for each autoradiograph. The autoradiographic images were analyzed with a microcomputer imaging device (MCID, Imaging Research, St. Catharines, Ontario, Canada).

#### Data Analysis: Local Cerebral Glucose Utilization

Before analysis, regions of interest (ROIs) were defined and identified in a rat stereotactic atlas<sup>20</sup> and used to construct a template for the image analyzer. To test our hypothesis, 19 specific ROIs were defined. On the basis of recent human<sup>21-23</sup> and rat studies<sup>24</sup> forebrain regions representing nociception were chosen in the ventroposterolateral nucleus of the thalamus, in the cingulate gyrus (area 29c, Von Economo classification<sup>25</sup>), and the primary and secondary (association) somatosensory cortices for the hind limb. Brainstem regions selected were those thought to be involved in the bulbospinal endogenous pain modulating system (amygdala periaqueductal gray, nucleus accumbens, nucleus raphe magnus, and nucleus gigantocellularis).<sup>24,26</sup> The habenula was included as part of the mesolimbic antinociceptive loop.<sup>27</sup> For comparison, we selected structures in the visual and auditory systems.

The LCGU values within each ROI were analyzed to determine whether there was any relative change in metabolic activity during hyperalgesia with thiopental. The analysis follows the procedures commonly used for functional brain mapping with positron emission tomography.<sup>21,28</sup> To evaluate the relative changes in the metabolic activity associated with thiopen-

tal administration, it was first necessary to reduce the intersubject and intergroup variability in global LCGU by scalar normalization of each image [(LCGU in each ROI/mean global LCGU)  $\times$  100].<sup>28</sup> Each of the seven animals was randomly paired with a control animal. The state-dependent change in LCGU for each region was calculated as the difference between the thiopental-treated and control animals. To obtain an estimate of the variance of the state-dependent change of LCGU,  $\Delta\text{LCGU}$  was calculated between randomly selected pairs of animals rather than as the difference between the means of each group. Normal distribution of these percentage values was confirmed with the Kolmogorov-Smirnov test. The  $\Delta\text{LCGU}$  values for 19 ROIs were compared with one-way analysis of variance by region. For each ROI, a *t* statistic was calculated by dividing the mean  $\Delta\text{LCGU}$  in the ROI by the standard error of the mean. The standard error of the mean was determined by dividing the average standard deviation for all of the ROIs by the square root of the number of subjects.<sup>21</sup> Mathematically the *t* statistic is:  $t = \text{mean } \Delta\text{LCGU}_i / \text{SEM}_{\Delta\text{LCGU}}$ , where mean  $\Delta\text{LCGU}_i$  is the mean state-dependent change in LCGU in region *i*, and  $\text{SEM}_{\Delta\text{LCGU}}$  is the standard error of the mean for state-dependent changes in LCGU in all of the ROIs. The effective degrees of freedom were estimated to be equal to (number of subject pairs - 1)(number of separate regions) = (6)(19) = 114.<sup>28</sup> The statistical significance of the *t* statistic for each region was assessed by comparison with a critical value of  $t = 3.037$  for  $\alpha = 0.0026$ , degrees of freedom = 114. The value of  $\alpha$  was determined from the Bonferroni correction for 19 comparisons  $\alpha = 0.05/19 = 0.0026$ .

Values of physiologic variables were analyzed by two-way repeated measures analysis of variance with drug treatment as one factor and time (initial *vs.* final) as the second factor. Individual differences were isolated with the Student-Newman-Keuls test. Statistical significance was inferred when  $P < 0.05$ . The SMRT values within each treatment group were analyzed by one-way analysis of variance.

Because the study did not include any unstimulated awake and anesthetized animals, we could not directly examine the effects of stimulation and anesthesia. For an indirect evaluation of these issues, we compared the patterns of LCGU in the two groups of animals from this study (stimulated awake and stimulated sedated) with patterns generated from data for three groups of animals studied previously in the same laboratory<sup>29</sup> (awake unstimulated rats ( $n = 8$ ) and rats anesthetized

to the first failure to respond to pentobarbital ( $n = 5$ ) or isoflurane. The LCGU in each of these regions was normalized by calculating a *Z* value, where  $Z = [\text{LCGU ROI} - \text{mean LCGU}] / \text{standard deviation for LCGU}$ . The *Z* values for each of the brain regions responsive to nociception were not evaluated in the pattern analysis, the regions were: (1) cortical regions: visual, auditory, parietal, frontal; (2) subcortical regions: mamillary body, medial geniculate nucleus, lateral geniculate nucleus, anterior hippocampus, lateral thalamus, ventral thalamus, globus pallidus, and caudate nucleus; (3) brainstem regions: cerebellar cortex, cerebellar nucleus, superior olive, lateral nucleus, and inferior colliculus. A score was calculated for each region, followed by Q-component analysis to determine statistical significance to differences between groups. This was not possible with the current studies, so the scores calculated remains unresolved.

#### Results

The effects of noxious stimulation on the measured physiological variables are summarized in table 1. There were no significant differences between initial values and final values determined in the thiopental-treated animals. The final mean  $\text{Pa}_{\text{CO}_2}$  value was  $38.5 \pm 0.5$  mmHg;  $P < 0.05$  then the

Table 1. Physiologic Variables

| Variable                                  |
|-------------------------------------------|
| $\text{Pa}_{\text{CO}_2}$ (mmHg)          |
| $\text{Pa}_{\text{O}_2}$ (mmHg)           |
| pH                                        |
| Rectal temperature ( $^{\circ}\text{C}$ ) |
| MAP (mmHg)                                |
| [Glucose] (mmol $\cdot$ dl $^{-1}$ )      |
| Weight (g)                                |

Values are mean  $\pm$  SD for 7 animals. Anir...  
\* $P < 0.05$  by ANOVA versus initial values  
 $\text{Pa}_{\text{CO}_2}$ ,  $\text{Pa}_{\text{O}_2}$  = arterial tensions of carbon...  
beginning and end, respectively, of the 2-h

## EFFECTS OF STIMULATION ON LCGU DURING SEDATION

to the first failure to respond to tail-clamp with either pentobarbital ( $n = 5$ ) or isoflurane ( $n = 3$ ). The pattern of LCGU in each of these five groups was characterized by calculating a Z value for each of 26 brain regions,<sup>29</sup> where  $Z = [\text{LCGU ROI} - \text{mean global LCGU}] / \text{standard deviation for LCGU in all regions}$ .<sup>28,30</sup> Many of the brain regions responsible for nociceptive processing were not evaluated in the previous study.<sup>29</sup> For pattern analysis, the regions selected were: (1) cortical regions: visual, auditory, parietal, sensory/motor, and frontal; (2) subcortical regions: superior colliculus, mamillary body, medial geniculate, dentate gyrus, anterior hippocampus, lateral geniculate, amygdala, lateral thalamus, ventral thalamus, habenula, hypothalamus, globus pallidus, and caudate; and (3) brainstem regions: cerebellar cortex, cochlear nucleus, vestibular nucleus, superior olive, lateral lemniscus, pontine gray, and inferior colliculus. Z-score pattern analysis usually is followed by Q-component factor analysis to assign statistical significance to differences in the patterns.<sup>30</sup> This was not possible with the small number of subjects in the current studies, so the significance of the patterns calculated remains unresolved.

## Results

The effects of noxious stimulation and thiopental infusion on the measured physiologic variables are summarized in table 1. There were no significant differences between initial values determined in the control and thiopental-treated animals. In the control group, the final mean  $\text{Pa}_{\text{CO}_2}$  value was significantly less ( $37 \pm 2$  mmHg;  $P < 0.05$ ) than the initial values ( $41 \pm 2$

mmHg) and the final blood glucose value ( $8.3 \pm 0.95$  mmol/dl) significantly greater than initial values ( $6.9 \pm 0.94$  mmol/dl). Thiopental infusion caused a respiratory acidosis: the  $\text{Pa}_{\text{CO}_2}$  increased from  $40 \pm 2$  to  $48 \pm 4$  mmHg ( $P < 0.05$ ), and the pH decreased from  $7.43 \pm 0.01$  to  $7.35 \pm 0.02$  ( $P < 0.05$ ). Rectal temperature fell in the thiopental treated animals, from  $36.7 \pm 0.7^\circ\text{C}$  to  $35.4 \pm 1.2^\circ\text{C}$  ( $P < 0.05$ ).

The infusion strategy provided plasma thiopental concentrations within the target range of 10–15  $\mu\text{g}/\text{ml}$  throughout the period of noxious stimulation and nociceptive threshold measurements. Plasma thiopental concentrations before and during the 2-DG study were  $11.1 \pm 1.8$  and  $13.0 \pm 2.1$   $\mu\text{g}/\text{ml}$ , respectively (table 2). The initial SMRT values were similar in the control and thiopental-treated groups. The thiopental infusion decreased the SMRT from  $277 \pm 32$  to  $215 \pm 25$  g before the 2-DG injection, and this reduction was maintained throughout the first 20 min of the 2-DG experiment ( $215 \pm 41$  g,  $P < 0.001$ ). The SMRT did not change in the control group ( $P = 0.68$ ). All of the animals in the thiopental group showed a behavioral effect from the thiopental. Three animals were classified as “drowsy” and four were “very drowsy.”

The results of the 2-DG measurements are summarized in table 3. The global mean LCGU in thiopental-treated animals ( $60 \pm 9$   $\mu\text{mol} \cdot 100$   $\text{g}^{-1} \cdot \text{min}^{-1}$ ) was significantly less than in the control group ( $85 \pm 5$   $\mu\text{mol} \cdot 100$   $\text{g}^{-1} \cdot \text{min}^{-1}$ ;  $P < 0.001$ ). The regional differences in normalized LCGU were confirmed to be normally distributed by the Kolmogorov-Smirnov test (K-S distance = 0.06,  $P = 0.052$ ). Analysis of the  $\Delta\text{LCGU}$  values by analysis of variance revealed that

Table 1. Physiologic Values

| Variable                                | Control (n = 7) |                  | Thiopental Treated (n = 7) |                   |
|-----------------------------------------|-----------------|------------------|----------------------------|-------------------|
|                                         | Initial         | Final            | Initial                    | Final             |
| $\text{Pa}_{\text{CO}_2}$ (mmHg)        | $41 \pm 2$      | $37 \pm 2^*$     | $40 \pm 2$                 | $48 \pm 4^*$      |
| $\text{Pa}_{\text{O}_2}$ (mmHg)         | $85 \pm 7$      | $98 \pm 10$      | $92 \pm 7$                 | $98 \pm 5$        |
| pH                                      | $7.43 \pm 0.01$ | $7.43 \pm 0.01$  | $7.43 \pm 0.01$            | $7.35 \pm 0.02^*$ |
| Rectal temperature ( $^\circ\text{C}$ ) | $36.5 \pm 0.5$  | $36.6 \pm 0.4$   | $36.7 \pm 0.7$             | $35.4 \pm 1.2^*$  |
| MAP (mmHg)                              | $127 \pm 8$     | $127 \pm 16$     | $128 \pm 4$                | $127 \pm 17$      |
| [Glucose] (mmol $\cdot$ dl $^{-1}$ )    | $6.8 \pm 0.94$  | $8.3 \pm 0.95^*$ | $7.6 \pm 1.0$              | $7.4 \pm 0.5$     |
| Weight (g)                              | $335 \pm 22$    |                  | $316 \pm 20$               |                   |

Values are mean  $\pm$  SD for 7 animals. Animals were weighed before catheter insertions.

\*  $P < 0.05$  by ANOVA versus initial values within the group.

$\text{Pa}_{\text{CO}_2}$ ,  $\text{Pa}_{\text{O}_2}$  = arterial tensions of carbon dioxide and oxygen, respectively; [Glucose] = plasma glucose concentration; Initial and final = sampling times at the beginning and end, respectively, of the 2-DG experiment.



Table 2. Somatic Motor Response Threshold Values

|                                                                        | Initial Measurement | Before 2-DG Measurement | During 2-DG Measurement | Within Group Analysis (ANOVA) |
|------------------------------------------------------------------------|---------------------|-------------------------|-------------------------|-------------------------------|
| SMRT control group (7 animals)                                         | 247 ± 26            | 237 ± 33                | 235 ± 34                | F = 0.386<br>P = 0.68         |
| SMRT thiopental treated group (7 animals)                              | 277 ± 32            | 215 ± 25*               | 215 ± 41*               | F = 8.21<br>P = 0.003         |
| Plasma thiopental concentration ( $\mu\text{g} \cdot \text{ml}^{-1}$ ) |                     | 11.1 ± 1.8              | 13.0 ± 2.1              |                               |

Values are mean ± SD. SMRT = measurements of the somatic motor response threshold.

\* Significant ( $P < 0.05$ ) difference from the initial measurement.

there were significant differences among the regions ( $F = 6.043$ ,  $P < 0.001$ ). The state-dependent changes in LCGU in cortical regions postulated to be involved in nociception (primary somatosensory cortex, secondary somatosensory cortex, and cingulate cortex;  $+3.4 \pm 14\%$ ) were significantly different from the visual and auditory cortex ( $-18 \pm 13\%$ ,  $P = 0.012$ ). Although there were significant changes in two structures in the mesolimbic antinociceptive loop, the nucleus accumbens and the habenular nucleus, the structures involved in the descending pain modulating system (periaqueductal gray and nucleus raphe magnus) did not show significant state-dependent differences.

Figure 1 shows the pattern of LCGU in 26 brain regions. The value Z quantifies, in units of standard deviation, the difference between the mean LCGU for the structure and the global mean LCGU across all structures. Thus, in this analysis, none of the structures in the cortical or brainstem regions was more than approximately 1.5 standard deviation units away from the global mean in any of the treatment groups. In the cortical and subcortical regions, there appear to be two consistent patterns. The animals subjected to tail pressure, with or without a thiopental infusion, demonstrate a pattern of regional LCGU variability similar to unstimulated normal control rats. The animals at surgical levels of anesthesia with pentobarbital or isoflurane show patterns in which LCGU variability appears to be less than in the unanesthetized groups. The brainstem structures showed much greater variability in all groups studied, and we cannot discern any simple patterns in these structures.

## Discussion

The main findings of this study were that, during a thiopental infusion that decreased the SMRT to tail

pressure by 23% ( $P < 0.001$ ), global LCGU decreased by 29% ( $P < 0.001$ ), and LCGU in cortical regions postulated to be involved in nociceptive processing was increased relative to the other cortical regions studied ( $P = 0.012$ ). Thus the results support the hypothesis that cortical processing of noxious stimuli was increased (relative to other cortical sensory regions) during thiopental infusions that reduce the SMRT. However, this may have been the result of enhanced nociceptive processing rather than the cause. Our initial hope was that the results would demonstrate a consistent pattern in  $\Delta\text{LCGU}$  throughout the cell assemblies that are hypothesized to be involved in pain perception. Specifically, we anticipated that the study would show increased of LCGU in sensory regions involved in both the affective and the discriminative aspects of pain perception, coupled with depression of LCGU in the brainstem nuclei involved in the descending pain modulating system. Such findings would be consistent with current hypotheses concerning the mechanisms of barbiturate-induced hyperalgesia.<sup>10</sup> However, the results of the current study do not conform to such a pattern and fail to support selective depression of the periaqueductal gray and the nucleus raphe magnus as a mechanism for the reduction in the SMRT observed.

$\Delta\text{LCGU}$  during the thiopental infusion was significantly different in two of the mesolimbic nuclei involved in antinociception, the nucleus accumbens ( $+17\%$ ) and the habenular nucleus ( $-17\%$ ), and in structures in the auditory system. The relative increase in the nucleus accumbens is not likely to be responsible for the decrease in the SMRT because activation of this nucleus is thought to have antinociceptive effects.<sup>27</sup> The likely effect of a relative depression of the habenula on nociception is not clear to us. The pattern of changes within the auditory system was not consistent. The auditory cortex and medial geniculate were relatively de-

Table 3. Local Cerebral Glucose Utilization

| Region                    | LCGU (mmol/100 g/min) |
|---------------------------|-----------------------|
| Prebrain                  | 8                     |
| S1                        | 10                    |
| Cingulate cortex          | 9                     |
| S2                        | 8                     |
| Thalamus, VPL nucleus     | 1                     |
| Brainstem nuclei          | 1                     |
| Periaqueductal gray       | 1                     |
| Nucleus accumbens         | 1                     |
| Nucleus raphe magnus      | 1                     |
| Nucleus gigantocellularis | 1                     |
| Amygdala                  | 1                     |
| Habenula                  | 1                     |
| Visual system             | 1                     |
| Visual cortex             | 1                     |
| Lateral geniculate body   | 1                     |
| Superior colliculus       | 1                     |
| Auditory system           | 1                     |
| Auditory cortex           | 1                     |
| Medial geniculate body    | 1                     |
| Inferior colliculus       | 1                     |
| Lateral lemniscus         | 1                     |
| Superior olive            | 1                     |
| Cochlear nucleus          | 1                     |

LCGU values are  $\mu\text{mol} \cdot 100 \text{ g}^{-1} \cdot \text{min}^{-1}$ , mean ± SD.  $\Delta\text{LCGU}$  = state-dependent difference for the mean difference; S1 and S2 are significant ( $P < 0.05$ ).

pressed, and the lateral lemniscus showed a relative increase. These findings suggest that the functional effects of thiopental were heterogeneous and subcortical systems subserved the SMRT to tail pressure response to the noxious stimulus. This measure of nociception under the conditions required because our laboratory previously found that thiopental on the SMRT does not influence the cortical systems required to abolish the SMRT. At much higher anesthetic concentrations of thiopental infusion, unresponsive usually occurs at plasma concentrations greater than 25–30  $\mu\text{g}/\text{ml}$ , and these animals are still responsive to tail

## EFFECTS OF STIMULATION ON LCGU DURING SEDATION

Table 3. Local Cerebral Glucose Utilization in 19 Regions of Interest

|                           | Mean LCGU          |                       | Normalized LCGU (%) |                       | $\Delta$ LCGU (%)<br>(CI) | t-Statistic |
|---------------------------|--------------------|-----------------------|---------------------|-----------------------|---------------------------|-------------|
|                           | Control<br>(n = 7) | Thiopental<br>(n = 7) | Control<br>(n = 7)  | Thiopental<br>(n = 7) |                           |             |
| Forebrain                 |                    |                       |                     |                       |                           |             |
| S1                        | 84 $\pm$ 9         | 64 $\pm$ 9            | 98 $\pm$ 9          | 106 $\pm$ 6           | 8 (7)                     | 1.48        |
| Cingulate cortex          | 101 $\pm$ 10       | 73 $\pm$ 14           | 118 $\pm$ 9         | 120 $\pm$ 14          | 3 (18)                    | 0.499       |
| S2                        | 92 $\pm$ 9         | 65 $\pm$ 11           | 108 $\pm$ 9         | 107 $\pm$ 5           | 0 (11)                    | 0.061       |
| Thalamus, VPL nucleus     | 81 $\pm$ 8         | 53 $\pm$ 8            | 95 $\pm$ 11         | 88 $\pm$ 5            | -7 (9)                    | -1.233      |
| Brainstem nuclei          |                    |                       |                     |                       |                           |             |
| Periaqueductal gray       | 65 $\pm$ 6         | 42 $\pm$ 8            | 76 $\pm$ 9          | 70 $\pm$ 11           | -6 (12)                   | -1.140      |
| Nucleus accumbens         | 67 $\pm$ 8         | 57 $\pm$ 10           | 78 $\pm$ 6          | 95 $\pm$ 15           | 17 (15)                   | 3.210*      |
| Nucleus raphe magnus      | 57 $\pm$ 7         | 40 $\pm$ 11           | 67 $\pm$ 7          | 67 $\pm$ 15           | 0 (11)                    | 0.029       |
| Nucleus gigantocellularis | 47 $\pm$ 5         | 40 $\pm$ 6            | 55 $\pm$ 6          | 65 $\pm$ 5            | 10 (8)                    | 1.874       |
| Amygdala                  | 48 $\pm$ 6         | 40 $\pm$ 9            | 56 $\pm$ 6          | 65 $\pm$ 8            | 9 (10)                    | 1.651       |
| Habenula                  | 101 $\pm$ 11       | 61 $\pm$ 9            | 118 $\pm$ 9         | 101 $\pm$ 7           | -17 (5)                   | -3.165*     |
| Visual system             |                    |                       |                     |                       |                           |             |
| Visual cortex             | 98 $\pm$ 8         | 61 $\pm$ 8            | 114 $\pm$ 7         | 100 $\pm$ 8           | -14 (13)                  | -2.585      |
| Lateral geniculate body   | 76 $\pm$ 8         | 49 $\pm$ 8            | 89 $\pm$ 6          | 80 $\pm$ 7            | -8 (10)                   | -1.512      |
| Superior colliculus       | 80 $\pm$ 8         | 47 $\pm$ 10           | 93 $\pm$ 6          | 78 $\pm$ 16           | -15 (11)                  | -2.886      |
| Auditory system           |                    |                       |                     |                       |                           |             |
| Auditory cortex           | 133 $\pm$ 2        | 82 $\pm$ 16           | 156 $\pm$ 7         | 134 $\pm$ 9           | -22 (10)                  | -4.127*     |
| Medial geniculate body    | 109 $\pm$ 3        | 68 $\pm$ 14           | 127 $\pm$ 7         | 111 $\pm$ 10          | -16 (9)                   | -3.074*     |
| Inferior colliculus       | 152 $\pm$ 12       | 103 $\pm$ 15          | 178 $\pm$ 11        | 171 $\pm$ 22          | -7 (28)                   | -1.345      |
| Lateral lemniscus         | 109 $\pm$ 9        | 93 $\pm$ 14           | 128 $\pm$ 7         | 154 $\pm$ 13          | 26 (15)                   | 4.878*      |
| Superior olive            | 123 $\pm$ 13       | 110 $\pm$ 18          | 143 $\pm$ 13        | 182 $\pm$ 24          | 38 (29)                   | 7.168*      |
| Cochlear nucleus          | 102 $\pm$ 13       | 79 $\pm$ 16           | 119 $\pm$ 10        | 130 $\pm$ 18          | 10 (18)                   | 1.901       |

LCGU values are  $\mu\text{mol} \cdot 100 \text{ g}^{-1} \cdot \text{min}^{-1}$ , mean  $\pm$  SD. n represents the number of animals. Normalized LCGU (%) = [LCGU in each region/global LCGU for each animal]  $\times$  100;  $\Delta$ LCGU = state-dependent difference in normalized LCGU values between the thiopental-treated and the control animals; CI = 95% confidence interval for the mean difference; S1 and S2 = primary and secondary somatosensory cortices, respectively.

\*  $P < 0.05$ .

pressed, and the lateral lemniscus and the superior olive showed a relative increase in activity. These data suggest that the functional effects of hyperalgesic doses of thiopental were heterogeneous within the auditory and subcortical systems subserving nociception.

The SMRT to tail pressure was used to quantify the response to the noxious stimulus in this study because this measure of nociception can be measured easily under the conditions required for autoradiography and because our laboratory previously determined the effects of thiopental on the SMRT.<sup>1</sup> Rampil<sup>31</sup> presented evidence to show that descending cortical and bulbar systems do not influence the concentration of isoflurane required to abolish the SMRT. This result was obtained at much higher anesthetic concentrations than those used in the current study. For example, in our model of thiopental infusion, unresponsiveness to head stimulation usually occurs at plasma thiopental concentrations greater than 25–30  $\mu\text{g}/\text{ml}$ , and the animals in this state are still responsive to tail-clamp.<sup>1</sup> When admin-

istering barbiturates or isoflurane, anesthetic depth has a major influence on LCGU throughout the brain.<sup>29</sup> Surgical anesthesia with pentobarbital or isoflurane was associated with a 50% decrease in global LCGU<sup>29</sup> in comparison to the 29% decrease observed in the current study with thiopental. The Z value patterns presented in figure 1 suggest that surgical anesthesia with either pentobarbital or isoflurane is associated with a reduction in LCGU variability, probably due to the large decrease in glucose metabolism throughout the brain. In contrast, the pattern for thiopental remains similar to that for the unstimulated awake controls. Cleland *et al.*<sup>9</sup> suggest that supraspinal mechanisms are important in barbiturate-induced enhancement of nociceptive transmission, including effects on the SMRT. Thus we believe that, although the SMRT may be a spinal cord reflex, it may be a useful marker to identify states of enhanced nociceptive transmission. In the current study, we have used functional brain mapping with LCGU to simultaneously examine many of the brain



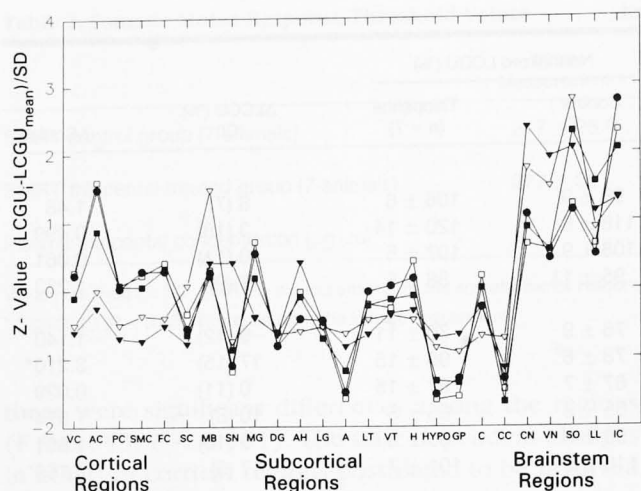

Fig. 1. Patterns of local cerebral glucose utilization (LCGU) in unstimulated animals (filled circles = unanaesthetized; empty triangles = anesthetized with isoflurane; filled triangles = anesthetized with pentobarbital) and in animals with repeated tail stimulation (empty squares = unanaesthetized; filled squares = sedated with thiopental). LCGU<sub>i</sub> = LCGU in the region of interest, *i*.

regions involved in nociception. LCGU has been used previously to identify focal activation of brain regions by physiologic and experimental stimuli.<sup>28,32</sup> During stimulation of peripheral nerves, LCGU increased around the afferent synaptic terminals, not in the cell bodies of the dorsal root ganglion.<sup>33</sup> The investigators proposed that, at the cellular level, the increase in LCGU was related to increased activity of synaptic Na<sup>+</sup>-K<sup>+</sup>-ATPase required to restore ionic gradients after each action potential. If this result applies generally, then an increase in LCGU in a structure means that input to that structure is increased, without specifying whether that input is excitatory or inhibitory. In the current study this would imply, for example, that the increase in LCGU in the nucleus accumbens (+17%) reflected an increase in afferent input to that nucleus.

The results in the current study do not support the hypothesis that the hyperalgesic effects of thiopental result from enhancement of processing throughout the primary somatosensory pathway. The most that can be said from this study is that cortical regions proposed to be involved in nociceptive processing were relatively activated during hyperalgesia in comparison to other cortical regions, which were relatively depressed. Because both groups of animals received noxious stimulation of an intensity adjusted to the threshold of response, this relative increase in LCGU may represent

enhanced cortical nociceptive processing during hyperalgesia. However, these results also may be explained simply by a relatively greater depression of unstimulated pathways by thiopental, with retained signal transmission and activation of the cortical projection of the primary somatosensory pathway.<sup>32</sup>

The physiologic changes caused by the thiopental infusion (decrease in rectal temperature and respiratory acidosis) were expected, because it was not practical to either servocontrol body temperature or to ventilate the lungs of sedated animals. Because the temperature coefficient  $Q_{10}$ , between 37°C and 27°C, is 2.2–2.4,<sup>34</sup> the temperature drop of 1.2°C likely decreased global LCGU by approximately 8%. Although the increase in PaCO<sub>2</sub> from 40 ± 2 to 48 ± 4 mmHg in the thiopental group would be likely to increase cerebral blood flow, we are not aware of any evidence that changes of this magnitude would influence LCGU. The effects of these physiologic changes on LCGU would influence global LCGU and, therefore, would have been minimized by the normalization procedures. We are not aware of any evidence that focal changes in LCGU result from changes in body temperature or PaCO<sub>2</sub> in this range.

It is difficult to assess the risk of a type II error in this study, because it is not clear what difference in LCGU we should expect and it is difficult to determine the power of the study to detect a pattern of LCGU change among several brain regions. The study is too small to detect isolated cortical LCGU increases of 9–11% associated with unilateral femoral nerve stimulation<sup>32</sup> (for a *t* test with a difference of 10%, SD 14%,  $\alpha = 0.05$ ,  $\beta = 0.80$ , then  $n = 32$  in each of the two groups). In contrast, in a study of chronic femoral nerve constriction, cortical LCGU increased 50–100%.<sup>24</sup> The current study has adequate power to detect isolated LCGU changes of 23% (for an unpaired *t* test with seven subjects in each group, SDΔLCGU = 14%,  $\alpha = 0.05$ ,  $\beta = 0.813$ ).

This study design has several important limitations that may be responsible for the failure to demonstrate specific enhancement of cell assemblies responsible for forebrain nociceptive processing. For cortical regions, we did not establish the exact location of the primary somatosensory cortex for the tail with an innocuous stimulus, such as vibration. Although we used the standard atlas locations, the activation may be sufficiently focal that this method could have missed an activation that was present.<sup>32</sup> This limitation does not apply to the anatomic locations of the subcortical and brainstem nuclei, which were identified easily on the

autoradiographs. Despite our continuous stimulation, during measurement, the rats may have visual, auditory, and tactile stimulation. Animals were treated in the specific stimulation may have been more difficult. We chose this because this can be done without the animal. Fore-paw or hind-paw requires that the animal be awake.<sup>16</sup> The choice of the tail side-to-side comparison of LCGU is a technique that may have been of small focal regions of activation. In summary, the results of the cerebral functional effects of thiopental are heterogeneous. Metabolic changes does not suppress enhanced nociceptive transmission of the primary nociceptive depression of brainstem pair results of this study require in experiments using similar animals that can demonstrate somatosensory cortex.

The authors thank Dr. K. W. Worsely and the Neurological Institute, for suggestions and funding in part by the University Program Research Fund.

## References

1. Archer DP, Ewen A, Roth SH. Spinal cord concentrations of thiopental in the rat. *ANESTHESIOLOGY* 80:168–171, 1994.
2. Dundee JW: Alterations in response to anesthesia: II. The effect of thiopental. *Br J Anaesth* 32:407–414, 1960.
3. Neal MJ: The hyperalgesic action of thiopental. *Pharmacol* 24:170–177, 1965.
4. Sandkühler J, Gebhart GF: Characterization of a spinal nociceptive reflex by stimulation of the brain and medulla in the pentobarbital-anesthetized rat. *Brain Res* 305:67–76, 1984.
5. Stein C, Morgan MM, Liebeskind DR: Inhibition of a spinal nociceptive reflex by descending modulation. *Brain Res* 400:1–10, 1987.
6. Hori Y, Lee KH, Chung JM, Ervin VJ: Small doses of barbiturate on the activity of cells. *Brain Res* 307:9–15, 1984.
7. Tomemori N, Komatsu T, Moriyama Y: The effect of sodium in cats. *Acta Anaesth*

## EFFECTS OF STIMULATION ON LCGU DURING SEDATION

autoradiographs. Despite our efforts to minimize extraneous stimulation, during the 45 min of the LCGU measurement, the rats may have received unintentional visual, auditory, and tactile stimuli. Although the control animals were treated in the same fashion, this non-specific stimulation may have contributed to variance in the measurements that made isolation of focal activation more difficult. We chose to stimulate the tail because this can be done without moving or disturbing the animal. Fore-paw or hind-paw stimulation usually requires that the animal be lightly restrained in a towel.<sup>16</sup> The choice of the tail unfortunately precluded side-to-side comparison of LCGU in each animal, a technique that may have been helpful in identification of small focal regions of activation.

In summary, the results of this study suggest that the cerebral functional effects of sedative concentrations of thiopental are heterogeneous. The distribution of metabolic changes does not support the hypothesis that enhanced nociceptive transmission is due to activation of the primary nociceptive pathways or selective depression of brainstem pain modulating nuclei. The results of this study require confirmation, particularly in experiments using stimulation paradigms in awake animals that can demonstrate activation of the primary somatosensory cortex.

The authors thank Dr. K. Worsely and Dr. E. Meyer, of the Montreal Neurological Institute, for suggestions in the analysis. Dr. Froelich was funded in part by the University of Calgary Anaesthesia Residency Program Research Fund.

## References

1. Archer DP, Ewen A, Roth SH, Samanani N: Plasma, brain, and spinal cord concentrations of thiopental associated with hyperalgesia in the rat. *ANESTHESIOLOGY* 80:168-176, 1994
2. Dundee JW: Alterations in responses to somatic pain associated with anaesthesia: II. The effect of thiopentone and phenobarbitone. *Br J Anaesth* 32:407-414, 1960
3. Neal MJ: The hyperalgesic action of barbiturates in mice. *Br J Pharmacol* 24:170-177, 1965
4. Sandkühler J, Gebhart GF: Characterization of inhibition of a spinal nociceptive reflex by stimulation medially and laterally in the midbrain and medulla in the pentobarbital-anesthetized rat. *Brain Res* 305:67-76, 1984
5. Stein C, Morgan MM, Liebeskind JC: Barbiturate-induced inhibition of a spinal nociceptive reflex: Role of GABA mechanisms and descending modulation. *Brain Res* 407:307-311, 1987
6. Hori Y, Lee KH, Chung JM, Endo K, Willis WD: The effects of small doses of barbiturate on the activity of primate nociceptive tract cells. *Brain Res* 307:9-15, 1984
7. Tomemori N, Komatsu T, Mori K: Antianalgesic action of thiamylal sodium in cats. *Acta Anaesthesiol Scand* 25:523-525, 1981
8. Collins JG, Ren K: WDR response profiles of dorsal horn neurons may be unmasked by barbiturate anesthesia. *Pain* 28:35-53, 1987
9. Cleland CL, Lim F, Gebhart GF: Pentobarbital prevents the development of C-fibre-induced hyperalgesia in the rat. *Pain* 57:31-43, 1994
10. Kitahata LM, Saberski L: Are barbiturates hyperalgesic? *ANESTHESIOLOGY* 77:1059-1061, 1992
11. Jewett BA, Gibbs LM, Tarasiuk A, Kendig JJ: Propofol and barbiturate depression of spinal nociceptive neurotransmission. *ANESTHESIOLOGY* 77:1148-1154, 1992
12. Sandkühler J, Fu A, Helmchen C, Zimmerman M: Pentobarbital, in subanesthetic doses, depresses spinal transmission of nociceptive information but does not affect stimulation-produced descending inhibition in the cat. *Pain* 31:381-390, 1987
13. Ewen A, Archer DP, Samanani N, Roth SH: Hyperalgesia during sedation: Effects of barbiturates and propofol in the rat. *Can J Anaesth* (in press)
14. Soncrant TT, Holloway HW, Stipetic M, Rapoport SI: Cerebral glucose utilization is not altered by hind limb restraint or by femoral artery and vein cannulation. *J Cereb Blood Flow Metab* 8:720-726, 1988
15. Gustafsson LL, Ebling WF, Osaki E, Harapat S, Stanski DR, Shafer SL: Plasma concentration clamping in the rat using a computer-controlled infusion pump. *Pharmaceut Res* 9:800-807, 1992
16. Kissin I, Brown PT, Robinson C, Bradley EL: Acute tolerance in morphine analgesia: Continuous infusion and single injection in rats. *ANESTHESIOLOGY* 74:166-171, 1991
17. Randall LO, Selitto JJ: A method for measurement of analgesic activity on inflamed tissue. *Arch Int Pharmacol Ther* 4:409-419, 1957
18. Crankshaw DP, Boyd MD, Bjorksten AR: Plasma drug efflux: A new approach to optimization of drug infusion for constant blood concentration of thiopental and methohexital. *ANESTHESIOLOGY* 67:32-41, 1987
19. Sokoloff L, Reivich M, Kennedy C, Des Rosiers MH, Patlak CS, Pettigrew KD, Sakurada O, Shinohara M: The [<sup>14</sup>C] deoxyglucose method for measurement of local cerebral glucose utilization: Theory, procedure, and normal values in the conscious and anesthetized albino rat. *J Neurochem* 28:897-916, 1977
20. Paxinos G, Watson C: *Stereotactic Atlas of Rat Brain*. New York, Academic, 1986, pp 49-77
21. Coghill RC, Talbot JD, Evans AC, Meyer E, Gjedde A, Bushnell MC, Duncan GH: Distributed processing of pain and vibration by the human brain. *Neuroscience* 14:4095-4108, 1994
22. Jones AKP, Brown WD, Friston KJ, Qi LY, Frackowiak RSJ: Cortical and subcortical localization of response to pain in man using positron emission tomography. *Proc R Soc Lond B* 244:39-44, 1991
23. Talbot JD, Marrett S, Evans AC, Meyer E, Bushnell MC, Duncan GH: Multiple representations of pain in human cerebral cortex. *Science* 251:1355-1358, 1991
24. Mao J, Mayer DJ, Price DD: Patterns of increased brain activity indicative of pain in a rat model of peripheral mononeuropathy. *J Neurosci* 13:2689-2702, 1993
25. Vogt BA: Cingulate cortex, Cerebral Cortex: Association and Auditory Cortices. Volume 4. Edited by Peters A, Jones EG. New York, Plenum, 1985, pp 89-149
26. Basbaum AI, Fields HL: Endogenous pain control systems: Brainstem spinal pathways and endorphin circuitry. *Ann Rev Neurosci* 7:309-338, 1984



27. Xuan YT, Shi YS, Zhou ZF, Han JS: Studies on the mesolimbic loop of antinociception: II. A serotonin-enkephalin interaction in the nucleus accumbens. *Neuroscience* 19:403-409, 1986
28. Fox PT, Mintun MA, Reiman EM, Raichle ME: Enhanced detection of focal brain responses using intersubject averaging and change distribution analysis of subtracted PET images. *J Cereb Blood Flow Metab* 8:642-653, 1988
29. Archer DP, Elphinstone MG, Pappius HM: The effect of pentobarbital and isoflurane on glucose metabolism in thermally injured rat brain. *J Cereb Blood Flow Metab* 10:624-630, 1990
30. Clark C, Carson R, Kessler R, Margolin R, Buchsbaum M, DeLisi L, King C, Cohen R: Alternative statistical models for the examination of clinical positron emission tomography/fluorodeoxyglucose data. *J Cereb Blood Flow Metab* 5:142-150, 1985
31. Rampil IJ: Anesthetic potency is not altered after hypothermic spinal cord transection in rats. *ANESTHESIOLOGY* 80:606-610, 1994
32. Crosby G, Crane AM, Jehle J, Sokoloff L: The local metabolic effects of somatosensory stimulation in the central nervous system of rats given pentobarbital or nitrous oxide. *ANESTHESIOLOGY* 58:38-43, 1983
33. Kadekaro M, Crane AM, Sokoloff L: Differential effects of electrical stimulation of sciatic nerve on metabolic activity in spinal cord and dorsal root ganglion in the rat. *Proc Natl Acad Sci USA* 82:6010-6013, 1985
34. Michenfelder JD, Milde JH: The relationship among canine brain temperature, metabolism and function during hypothermia. *ANESTHESIOLOGY* 75:130-136, 1991

## Does Early Post-Operative Endotoxin-Induced Lung Injury, Resulting in Adult Respiration Failure, Pretreatment with Lidocaine Pretreatment Has a Protective Effect?

Kishoru Nishina, M.D., \* Katsuya Moriguchi, M.D., †  
 Hidefumi Obara, M.D. ‡

**Background:** It is well known that lung injury, resulting in adult respiratory failure, is a common complication of major surgery. Lidocaine pretreatment has been reported to have a protective effect against endotoxin-induced lung injury in a rat model. The present study was to determine whether lidocaine pretreatment with intravenous lidocaine pretreatment could protect against lung injury induced by endotoxin in a rabbit model.

**Methods:** Thirty-two male rabbits were randomly assigned to receive one of four groups: infusion of saline (group S), lidocaine treatment (group E-S), lidocaine treatment (group E-L), and infusion of endotoxin (group E-E). In groups S and S-L, the animals received saline by continuous infusion of lidocaine (1 mg·kg<sup>-1</sup>·h<sup>-1</sup> in groups S and L, and 1 mg·kg<sup>-1</sup>·h<sup>-1</sup> in groups E-S and E-L). The rabbits' lungs were removed at 6 h after the observation period (6 h). After the observation period, the fraction of bronchoalveolar lavage fluid (BALF) containing activated complement, cytokines, and arachidonic acid were measured and analyzed. The ratio of weight (W/D weight ratio) and BALF were analyzed as indexes of lung injury. Lidocaine-pretreated rabbits (representing O<sub>2</sub> production) in the pulmonary artery and light microscopy were compared among the

\* Research Fellow in Anesthesiology

† Assistant Professor in Anesthesiology

‡ Associate Professor of Anesthesiology

§ Instructor in Anesthesiology

¶ Professor and Chair of Anesthesiology

Received from the Department of Anesthesiology, School of Medicine, Kobe University, Kobe, Japan. Submitted for publication March 1994. Accepted for publication May 1994.

Address reprint requests to Dr. Nishina, Department of Anesthesiology, Kobe University School of Medicine, Kobe 650, Japan.

Anesthesiology, V 83, No 1, Jul 1995
